# Supplementary material for: A shear gradient-activated microfluidic device for automated monitoring of whole blood haemostasis and platelet function
Source: PubMed Central journal article supplement (PMC4729824; doi:10.1038/ncomms10176), 2016-01-06
Supplement: ncomms10176-s1.pdf [file ncomms10176-s1.pdf]

## SUPPLEMENTARY FIGURES

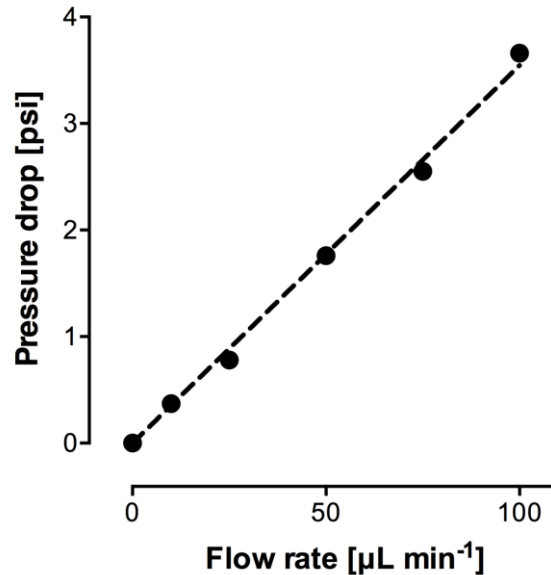

**Supplementary Figure 1. Analysis of dynamic range of measurement.** Pressure drop measured via inline pressure sensor vs applied flow rates when whole blood drawn in sodium citrate is perfused through the device containing 12-parallel stenosed microchannels (circle). The dotted lines indicate linear curve fit to measured data. For a 12-lane device, the pressure drop is in the range 0.4 – 3.5 psi and if the anticoagulation is removed and blood is allowed to clot, the pressure drop inside the device could reach 1.5 – 12 psi. This dynamic range is suitable to measure hemostasis using the inline pressure sensor that operates within 0-30 psi pressure range (2 individual experiments were performed).

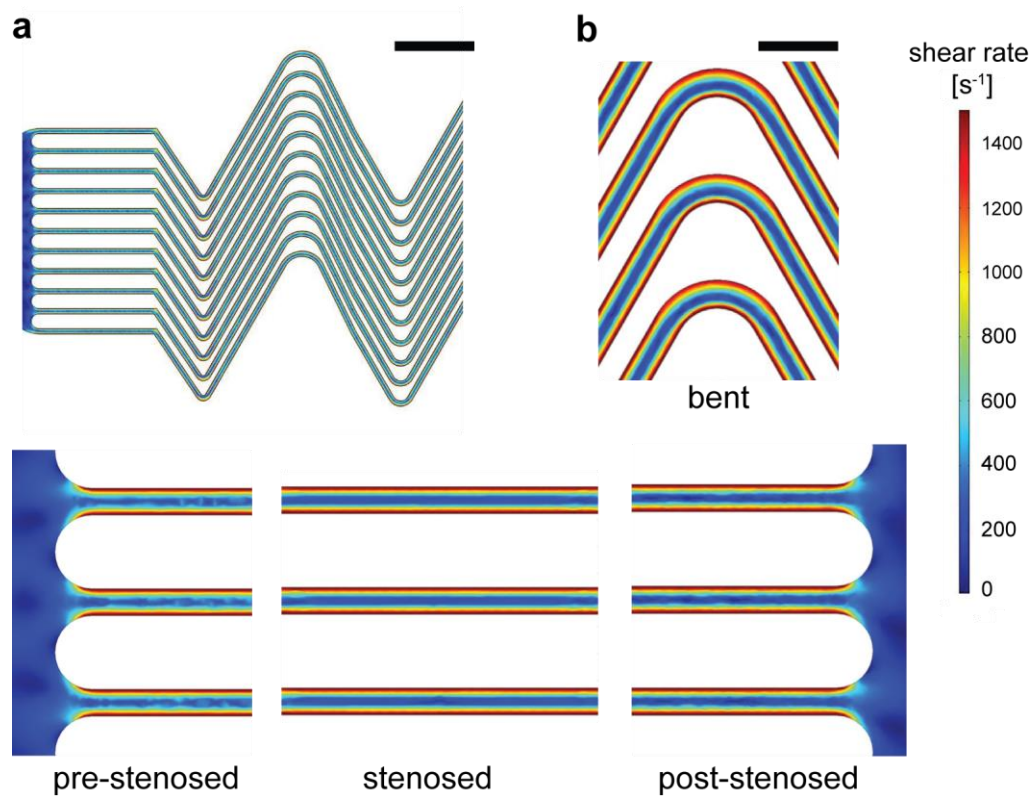

**Supplementary Figure 2. Shear rate distribution in the microdevice.** A representative heat map showing shear rate ( $\text{s}^{-1}$ ) distribution in **a**) a large section of the device (bar, 1 mm), and **b**) bent, pre-stenosed, stenosed and post-stenosed sections of the device, at an inlet velocity of  $u = 0.2 \text{ m s}^{-1}$  (bar,  $400 \mu\text{m}$ ).

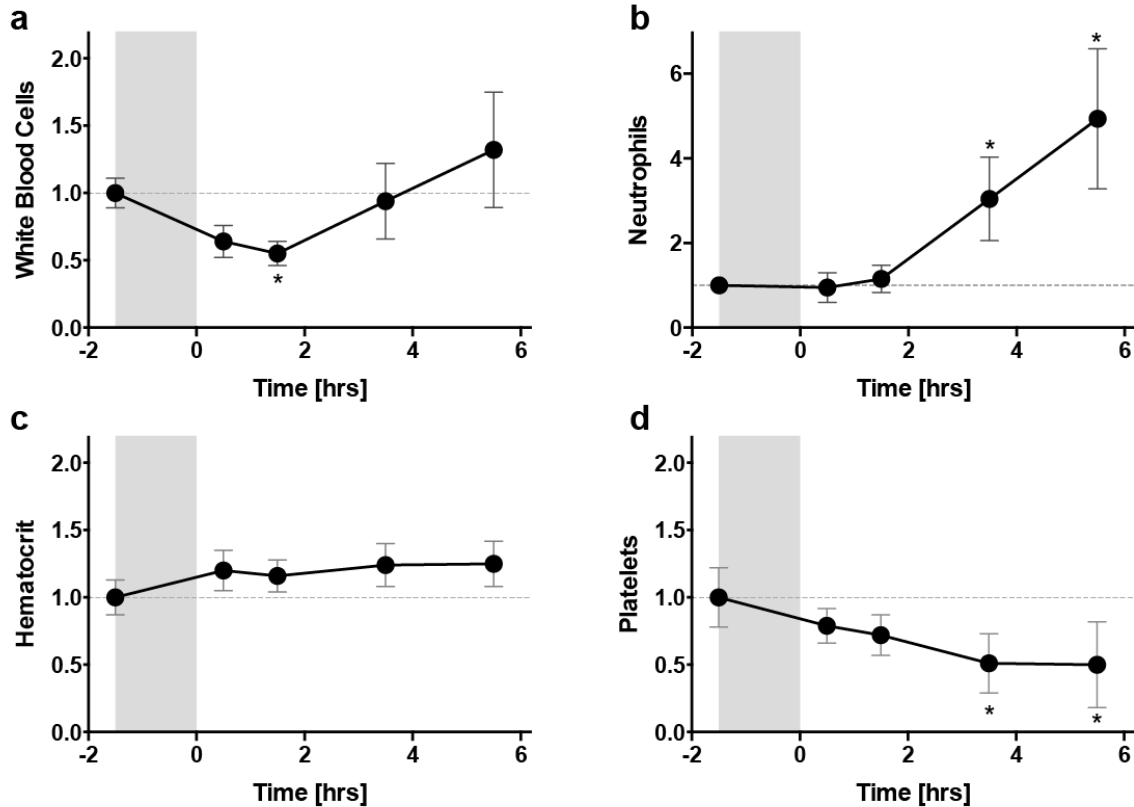

**Supplementary Figure 3. Blood cell count in coagulopathy.** Fold change (relative to baseline (-----) at -1.5 hours) in **a**) white blood cell count (mean baseline =  $10.41 \times 10^9/L$ ), **b**) neutrophil count (mean baseline =  $2.47 \times 10^9/L$ ), **c**) hematocrit (baseline = 30.13%) and **d**) platelet count (baseline =  $281.5 \times 10^9/L$ ), during 6 hours of monitoring in porcine model of endotoxemia (n = 3 pigs, measured in duplicate and averaged at each time point). \*P<0.05 vs baseline; one-way ANOVA, s.e.m.

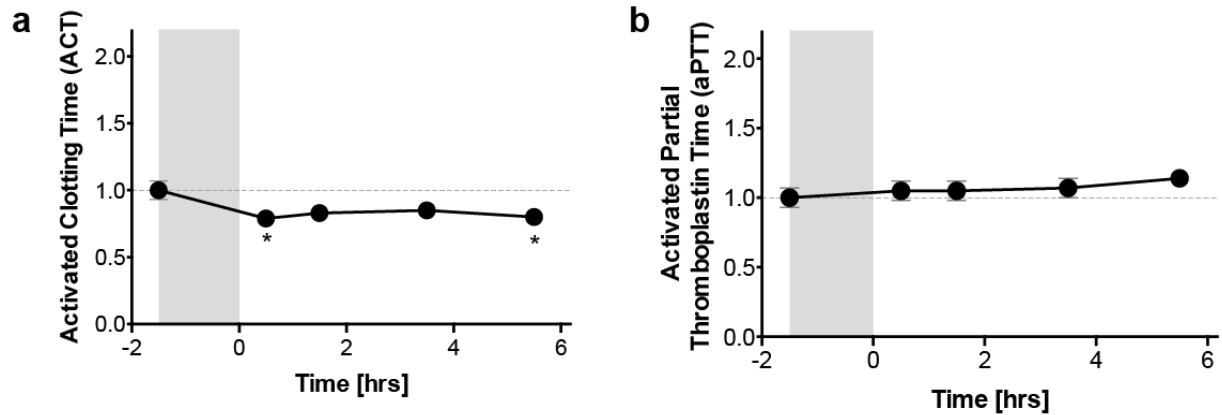

**Supplementary Figure 4. Standard coagulation assays in coagulopathy.** Fold change (relative to baseline (-----) at -1.5 hours) **a)** ACT (mean baseline = 126.50 s), and **b)** aPTT (mean baseline = 78.45 s), during 6 hours of monitoring in porcine model of endotoxemia (n = 3 pigs, measured in duplicate and averaged at each time point). \*P<0.05 vs baseline, one-way ANOVA, s.e.m.

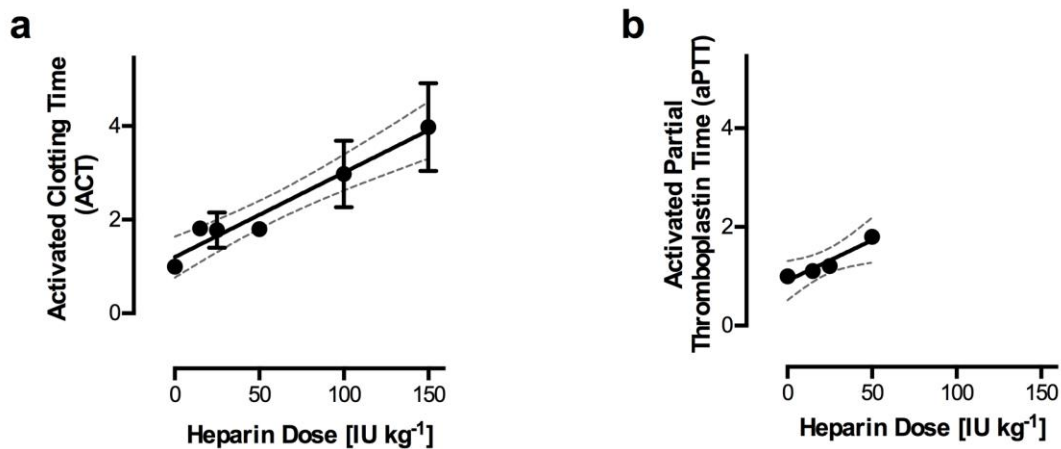

**Supplementary Figure 5. Standard coagulation assays in heparin therapy.** Fold change (relative to baseline at no heparin) **a)** ACT (mean baseline = 119.63 s, and **b)** aPTT (mean baseline = 81.35 s), at various therapeutic heparin doses injected to the pig (n = 3 pigs, measured in duplicate and averaged for each heparin dose). Line of linear regression (—), region of 95% confidence interval (-----). error bar, s.e.m.

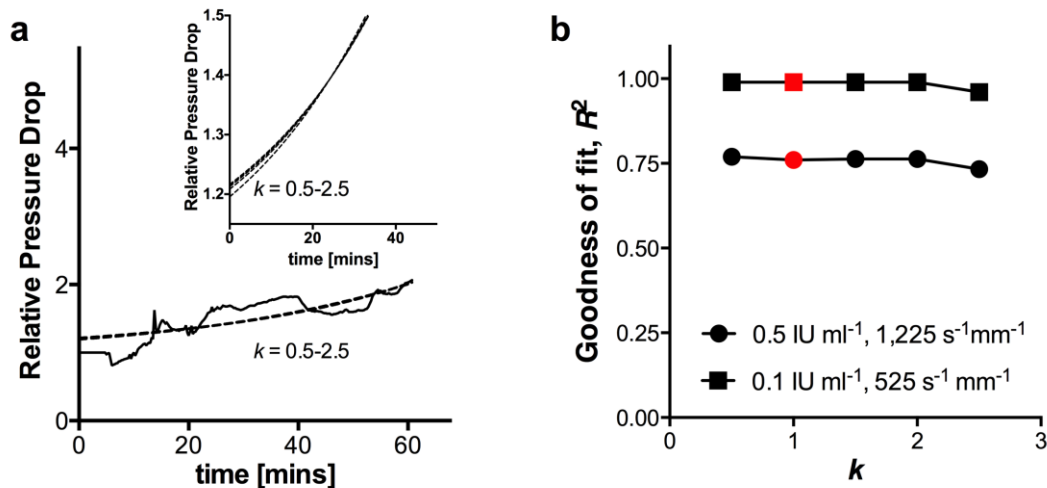

**Supplementary Figure 6. Sensitivity analysis of parameter,  $k$ , in the range [0.5-2.5], to the goodness of fit,  $R^2$ .** a) Regression curves at variable  $k$  values shown for a representative condition of rise in pressure drop when blood was perfused through the device ( $0.5 \text{ IU ml}^{-1}, 525 \text{ s}^{-1} \text{ mm}^{-1}$ ). Solid line is experimental data and dotted lines are the regression curve fit. b) Goodness of fit,  $R^2$ , versus  $k$  showing that curve-fits for two datasets, ( $0.5 \text{ IU ml}^{-1}, 525 \text{ s}^{-1} \text{ mm}^{-1}$ ) and ( $0.1 \text{ IU ml}^{-1}, 1,225 \text{ s}^{-1} \text{ mm}^{-1}$ ), are not sensitive to the parameter  $k$ . Therefore,  $k = 1$  (red) is a good approximation to determine microfluidic clotting time.

**Supplementary Table 1.** Goodness of Fit parameter,  $R^2$ , of respective curve fits at various shear rate gradients and heparin concentrations. The mean value from three experiments rounded to two decimal places is reported. NA: Not Applicable

|      | Shear Rate Gradients [ $\text{s}^{-1} \text{ mm}^{-1}$ ] |      |       |       |       |       |
|------|----------------------------------------------------------|------|-------|-------|-------|-------|
|      | 262.5                                                    | 525  | 1,225 | 2,625 | 4,375 | 8,750 |
| 0    | NA                                                       | NA   | 0.99  | NA    | 0.99  | NA    |
| 0.1  | NA                                                       | NA   | 0.99  | NA    | 0.97  | NA    |
| 0.25 | NA                                                       | 0.91 | 0.92  | 0.98  | 0.86  | 0.9   |
| 0.5  | NA                                                       | 0.77 | 0.76  | 0.88  | 0.83  | 0.82  |
| 1    | NA                                                       | NA   | 0.84  | NA    | 0.89  | NA    |
